# Supplementary material for: Pathway Implications of Aberrant Global Methylation in Adrenocortical Cancer
Source: PLoS One. 2016 Mar 10;11(3):e0150629. doi: 10.1371/journal.pone.0150629 (PMC4786116; doi:10.1371/journal.pone.0150629)
Supplement: S4 Table — (XLSX) [file pone.0150629.s004.xlsx]

## Sheet: TCGA_Methyl_ternary
Supplementary Table 4. List of TCGA Methylation-Expression correlations according to published Ternary method.
Each methylation probe was correlated to each expression probe according to gene symbol. Negative correlations (-1) denote correlations are in opposite directions.
Positive correlations indicate correlations in the same direction.				The table is unfiltered by p-value.
450K ProbeID	Gene Symbol	chromosome	Low Methylation (U) Group (n)	High Methylation (M) Group (n)	Expression value for U methylation group	Expression value for M methylation group	Direction of correlation	p-value
cg00004818	AGA	4	55	7	9.06374	8.3634	-1	0.0528367
cg00056066	ARHGAP21	10	46	18	10.535	10.1486	-1	0.172849
cg00121045	UNKL	16	17	58	9.60777	9.14207	-1	0.0444078
cg00226923	FGD2	6	3	3	5.87646	3.44248	-1	0.258707
cg00236832	RARA	17	27	49	9.34507	8.84243	-1	0.00253246
cg00425217	NFIX	19	17	44	9.03923	10.0447	1	0.0152736
cg00587228	HCN2	19	5	62	9.10075	9.2903	1	0.790295
cg00604193	DGCR2	22	2	76	11.3177	11.0727	-1	0.357114
cg00604193	DGCR11	22	2	76	4.6469	4.01045	-1	0.00662827
cg00660232	RRP1B	21	8	63	9.13745	9.40953	1	0.0180554
cg00689651	NFIX	19	32	39	9.10705	10.3586	1	5.1362e-05
cg00748718	TKT	3	27	31	12.6957	12.2269	-1	0.00822465
cg00790847	SLC2A13	12	28	43	9.82036	8.83903	-1	3.99597e-05
cg00857480	TRDMT1	10	12	43	7.01031	6.81583	-1	0.492511
cg00907267	ERBB3	12	5	54	8.77535	3.20698	-1	0.0257758
cg01094950	ZFP36L2	2	29	42	10.8324	10.9169	1	0.687503
cg01094950	LOC100129726	2	29	42	1.11339	1.60378	1	0.187019
cg01096266	ZNF518B	4	19	46	8.42112	8.64359	1	0.530012
cg01172682	MAGI1	3	5	72	8.82706	8.18444	-1	0.247597
cg01205019	TBC1D1	4	2	74	9.37898	9.39744	1	0.981437
cg01377358	ASXL1	20	63	9	10.6037	10.3287	-1	0.0865927
cg01622304	PDX1	13	38	37	-1.01079	3.101	1	6.20392e-08
cg01710450	CPNE7	16	4	66	1.99556	2.10457	1	0.92633
cg01718116	DPP10	2	57	3	7.36177	-1.16573	-1	8.45711e-22
cg01752462	ANO7	2	23	51	4.62217	4.65488	1	0.90939
cg01879083	CMBL	5	9	51	10.5351	10.9378	1	0.679569
cg01972875	FAM65A	16	68	8	10.2538	9.09077	-1	0.00631113
cg01989908	NFIX	19	11	61	9.18184	9.813	1	0.23501
cg02001694	LSM6	4	9	59	7.56078	7.65862	1	0.494707
cg02015876	SYNM	15	75	3	10.1673	6.1165	-1	0.0300787
cg02117924	ITGB2	21	5	68	9.35518	8.58764	-1	0.258743
cg02237906	RAB37	17	55	17	4.51091	5.14336	1	0.347222
cg02360175	GLYR1	16	56	9	11.1728	11.0651	-1	0.57661
cg02367708	CXCR4	2	70	8	12.2437	10.4727	-1	0.0126185
cg02499139	TNIK	3	2	58	5.88951	8.03121	1	0.546372
cg02515725	PDLIM3	4	75	2	6.69968	5.20595	-1	0.497522
cg02586212	RGS1	1	2	72	10.9505	8.14098	-1	0.333426
cg02622316	ZSCAN12	6	66	11	7.42309	7.0782	-1	0.193283
cg02705800	FAM174B	15	66	10	7.16101	5.49607	-1	0.00374456
cg02770887	SEC22A	3	3	73	8.18416	8.02895	-1	0.683563
cg02888247	C6orf62	6	70	6	11.5218	11.0554	-1	0.0794187
cg02898721	RARA	17	20	52	9.43356	8.87185	-1	0.00570085
cg03043696	GNB1	1	26	46	12.2589	12.2323	-1	0.851742
cg03085312	RARA	17	19	57	9.39889	8.91766	-1	0.0117034
cg03115562	NTM	11	44	27	2.50939	6.37559	1	3.65771e-07
cg03291825	TK1	17	5	59	8.67263	7.68534	-1	0.305873
cg03291825	AFMID	17	5	59	7.58021	7.12288	-1	0.545364
cg03496157	BCL7A	12	3	33	8.42308	9.19152	1	0.362291
cg03524848	HSPA6	1	9	63	6.587	6.6433	1	0.888559
cg03576469	CCDC8	19	38	35	10.8973	7.23582	-1	1.43597e-08
cg04075191	DPP10	2	73	3	6.65152	-1.16573	-1	7.35914e-22
cg04091816	PDK2	17	22	50	11.4852	10.0236	-1	1.48826e-08
cg04116469	MAP4K4	2	3	74	9.70535	9.72387	1	0.963274
cg04184297	SLC16A3	17	7	70	9.45061	9.41232	-1	0.963668
cg04410777	SEMA6B	19	67	11	10.1948	12.6348	1	4.76892e-08
cg04521391	TTBK1	6	3	55	1.54416	0.517595	-1	0.529709
cg04670168	MYOZ3	5	27	23	2.44067	3.22532	1	0.0776827
cg04808672	SMURF2	17	76	2	7.88539	8.24097	1	0.440037
cg04809274	HLA-DOA	6	27	43	7.60996	5.58507	-1	1.47911e-05
cg04964031	PCDHGA4	5	6	67	4.26425	5.2943	1	0.461477
cg04964031	PCDHGC3	5	6	67	12.0912	12.2773	1	0.759476
cg04964031	PCDHGA12	5	6	67	5.1039	6.37824	1	0.161136
cg04964031	PCDHGA11	5	6	67	5.19971	5.09911	-1	0.925317
cg04964031	PCDHGA9	5	6	67	7.00977	4.38176	-1	0.001171
cg04964031	PCDHGA1	5	6	67	3.37208	4.65059	1	0.34071
cg04964031	PCDHGB1	5	6	67	4.24463	4.32643	1	0.937576
cg04964031	PCDHGC5	5	6	67	2.14259	3.35724	1	0.40691
cg04964031	PCDHGB6	5	6	67	7.62236	5.58078	-1	0.140449
cg04964031	PCDHGB3	5	6	67	3.1705	3.50598	1	0.75008
cg04964031	PCDHGB7	5	6	67	7.81552	6.74267	-1	0.309176
cg04964031	PCDHGA6	5	6	67	5.0962	5.65482	1	0.572336
cg04964031	PCDHGA8	5	6	67	4.30957	5.52047	1	0.304368
cg04964031	PCDHGA10	5	6	67	5.05797	5.91427	1	0.4433
cg04964031	PCDHGA5	5	6	67	2.5903	4.02169	1	0.0977328
cg04964031	PCDHGB4	5	6	67	5.257	6.63902	1	0.246311
cg04964031	PCDHGC4	5	6	67	0.0994423	2.03366	1	0.211344
cg04964031	PCDHGA3	5	6	67	5.36518	4.88037	-1	0.764546
cg04964031	PCDHGA2	5	6	67	4.63314	4.96375	1	0.75387
cg04964031	PCDHGA7	5	6	67	3.15576	5.87513	1	0.000262964
cg04964031	PCDHGB2	5	6	67	4.74381	4.7502	1	0.994895
cg04964031	PCDHGB5	5	6	67	6.23907	7.16713	1	0.2821
cg04990202	S100A16	1	5	70	12.1156	8.1528	-1	0.00123217
cg05022688	CLDN11	3	19	41	3.66172	3.78013	1	0.811841
cg05032848	RFFL	17	76	2	8.48921	7.84334	-1	0.340078
cg05142272	CBLN3	14	18	50	8.33195	8.41642	1	0.82305
cg05209306	ZFP36	19	19	47	11.6	10.4712	-1	0.00049465
cg05317605	SEMA6B	19	57	19	9.86167	12.4639	1	4.47936e-14
cg05385100	PSEN1	14	17	37	10.462	10.5951	1	0.191639
cg05480042	HIST1H2AE	6	70	7	4.50582	2.74218	-1	0.0704866
cg05480042	HIST1H2BG	6	70	7	1.39962	-1.05335	-1	0.00132421
cg05488778	ARHGEF10	8	45	12	8.82151	7.96034	-1	0.00175178
cg05586134	PTCRA	6	5	66	-0.44895	-0.202618	1	0.783261
cg05663643	ZNRD1	6	70	2	8.88375	8.28378	-1	0.36682
cg05663643	NCRNA00171	6	70	2	4.82328	4.84612	1	0.940893
cg05703996	PDIA2	16	3	68	-1.86221	0.254611	1	0.330299
cg06085579	PLD1	3	34	33	9.66156	9.63133	-1	0.877691
cg06169590	ZFP36L2	2	18	48	11.0852	10.9147	-1	0.351576
cg06169590	LOC100129726	2	18	48	1.06928	1.4643	1	0.326867
cg06206626	ASPHD2	22	15	58	3.48769	4.57473	1	0.00209445
cg06286401	MAPK8IP3	16	11	11	10.8895	10.8879	-1	0.997097
cg06329345	PRDM5	4	58	20	5.35648	4.40343	-1	0.0756592
cg06344807	SLC9A3R1	17	36	35	10.525	8.80915	-1	6.77192e-06
cg06536578	JPH4	14	6	70	4.39497	2.12118	-1	0.00425061
cg06626556	ULK4	3	5	72	5.31532	5.37654	1	0.882574
cg06646174	SIK3	11	3	67	9.74241	9.10292	-1	0.126022
cg06671340	DENND1B	1	55	17	3.66632	2.3304	-1	0.00473981
cg06855485	GAB1	4	57	9	8.66792	8.12238	-1	0.151086
cg06901890	FNBP1	9	6	65	9.89214	9.43645	-1	0.121162
cg07030373	EPB41L1	20	5	72	12.3658	12.7006	1	0.631876
cg07080551	ADAM12	10	6	57	4.82197	5.54617	1	0.275219
cg07124372	SMAD6	15	38	34	6.32422	5.57105	-1	0.0138154
cg07178864	NFASC	1	8	69	8.25099	8.15685	-1	0.889322
cg07190535	PDE4D	5	73	4	6.47582	7.95969	1	0.351734
cg07280593	LILRA2	19	62	8	4.01836	3.6294	-1	0.436129
cg07369345	STK4	20	2	71	9.99487	10.1053	1	0.445903
cg07414525	CHL1	3	34	24	1.11481	7.77998	1	3.56601e-08
cg07473249	MARCKS	6	75	3	10.5059	8.65944	-1	0.30259
cg07587588	TPD52	8	28	46	8.60085	8.01825	-1	0.145232
cg07594247	PAX8	2	19	53	8.3331	5.31758	-1	7.26259e-15
cg07594247	LOC654433	2	19	53	9.79071	4.01451	-1	1.80398e-28
cg07613268	CCHCR1	6	59	10	8.40896	8.27002	-1	0.705291
cg07655025	TNPO2	19	25	53	11.39	11.6525	1	0.0330478
cg07910075	S100A16	1	4	69	11.9524	8.08494	-1	0.0082213
cg08124156	RNF220	1	13	62	10.4873	10.2463	-1	0.058151
cg08125503	NCOR1	17	32	40	9.4123	9.33107	-1	0.56296
cg08125503	PIGL	17	32	40	6.53894	6.38754	-1	0.500521
cg08241694	DDC	7	56	11	1.50745	3.16434	1	0.0349939
cg08251901	ARHGDIB	12	2	73	10.6734	10.0062	-1	0.637226
cg08296680	SLC16A3	17	6	68	9.98381	9.31529	-1	0.473521
cg08319103	HRNBP3	17	15	57	-0.635193	0.514468	1	0.0861994
cg08332908	RARA	17	8	62	9.1339	8.9907	-1	0.461662
cg08355260	LOC151534	2	16	59	6.74308	5.53388	-1	0.0455847
cg08355260	LBX2	2	16	59	2.43852	1.48154	-1	0.161944
cg08415391	SLIT2	4	35	38	4.21388	7.86284	1	2.30167e-09
cg08432509	RTEL1	20	9	66	9.33274	9.6298	1	0.174145
cg08461339	ANKMY1	2	2	75	8.20968	7.43033	-1	0.396264
cg08524803	ZNF423	16	2	71	6.83845	7.89201	1	0.586948
cg08550421	PCDHA7	5	71	7	5.25947	2.45556	-1	0.0102887
cg08550421	PCDHAC1	5	71	7	2.98712	-0.603483	-1	0.040939
cg08550421	PCDHA12	5	71	7	4.18562	0.80504	-1	0.00191789
cg08550421	PCDHA6	5	71	7	4.85324	0.511573	-1	0.0414645
cg08550421	PCDHA10	5	71	7	5.66663	1.76011	-1	0.00144927
cg08550421	PCDHA4	5	71	7	4.1718	1.61211	-1	0.0305589
cg08550421	PCDHA11	5	71	7	4.59303	0.0400655	-1	0.000250666
cg08550421	PCDHA8	5	71	7	1.88307	-2.00696	-1	0.0108171
cg08550421	PCDHA1	5	71	7	3.49272	1.17143	-1	0.0365707
cg08550421	PCDHA2	5	71	7	3.24421	0.793505	-1	0.0172403
cg08550421	PCDHA9	5	71	7	1.05975	-1.39385	-1	0.0738535
cg08550421	PCDHA13	5	71	7	3.53848	-0.310842	-1	0.0388051
cg08550421	PCDHA5	5	71	7	2.24954	0.0372768	-1	0.182247
cg08550421	PCDHA3	5	71	7	4.62022	1.5279	-1	0.00564855
cg08575233	HOXA11	7	4	68	6.40179	5.89847	-1	0.72849
cg08575233	HOXA10	7	4	68	8.4847	8.19274	-1	0.782407
cg08605301	WIPF3	7	2	73	3.74353	5.78509	1	0.417027
cg08633239	C8orf44	8	38	25	4.96646	4.96888	1	0.98989
cg08689929	EGLN2	19	26	46	11.2981	11.1818	-1	0.414753
cg08696470	PAFAH1B1	17	43	27	11.26	11.2975	1	0.707695
cg08877374	FABP3	1	36	29	12.5707	8.10752	-1	1.12376e-10
cg08886823	ESRP2	16	8	66	7.57668	7.54145	-1	0.86858
cg08986368	INS-IGF2	11	75	3	4.20481	-0.505241	-1	0.0355961
cg08986368	IGF2	11	75	3	17.3708	12.0115	-1	0.261269
cg09027133	MAN1C1	1	8	66	10.6588	9.16686	-1	0.0640621
cg09157431	PAFAH1B1	17	63	13	11.2893	11.1714	-1	0.301974
cg09224393	NPAS3	14	4	68	5.40865	5.15928	-1	0.872522
cg09375488	ASB4	7	57	7	8.18509	3.13597	-1	0.024083
cg09505136	GLT25D1	19	6	24	11.1268	10.5739	-1	0.029571
cg09562683	CALHM2	10	18	51	10.0584	8.41265	-1	9.78727e-07
cg09571376	NAV2	11	2	73	9.15746	7.18398	-1	0.0708755
cg09612413	UPF2	10	67	8	8.99294	8.87598	-1	0.59804
cg09654300	TRAK1	3	4	74	9.82934	9.6441	-1	0.697464
cg09696486	A2BP1	16	50	16	1.06044	3.41279	1	0.0336138
cg09738156	MAP6D1	3	58	11	5.02155	5.10215	1	0.772137
cg09779027	INSR	19	5	71	12.0946	12.1061	1	0.965636
cg09858022	RARA	17	9	61	8.98658	8.97326	-1	0.954349
cg09873772	GLYR1	16	47	14	11.0994	11.2374	1	0.457387
cg09962974	ENTPD4	8	27	46	8.14496	8.19982	1	0.76741
cg10094358	TCF19	6	13	47	7.62081	8.1461	1	0.206067
cg10094358	CCHCR1	6	13	47	8.39584	8.36945	-1	0.910649
cg10098010	KIAA1244	6	51	22	3.31439	3.3282	1	0.983478
cg10278149	KLF7	2	2	73	7.26327	5.34998	-1	3.9998e-05
cg10364881	DKK3	11	22	44	9.56436	8.13231	-1	0.00797698
cg10428394	SNRPN	15	64	5	10.6912	11.2863	1	0.652874
cg10515048	SOS2	14	76	2	9.88186	10.1149	1	0.648518
cg10531073	BAIAP2L2	22	9	66	2.90207	3.09588	1	0.767202
cg10552903	BCL7A	12	4	64	8.91166	9.17024	1	0.516828
cg10671757	ZNF385B	2	29	43	3.78507	7.14258	1	7.3069e-06
cg10677017	NTM	11	43	22	2.44213	6.77831	1	8.81392e-07
cg10996368	NTM	11	37	19	2.27682	7.13094	1	6.88958e-09
cg11031701	TBX2	17	51	24	8.46794	7.4097	-1	6.9167e-05
cg11171429	PRDM5	4	70	7	5.23675	3.69047	-1	0.256728
cg11316784	NSD1	5	66	10	10.3678	10.4523	1	0.626575
cg11385473	IMMP1L	11	76	2	6.13373	5.88067	-1	0.574724
cg11385473	ELP4	11	76	2	7.65239	7.74774	1	0.624606
cg11545720	SEMA6B	19	15	51	8.87041	11.107	1	1.50429e-05
cg11565512	MEGF10	5	61	7	9.18993	3.94683	-1	0.00116224
cg11763394	PAX8	2	20	53	8.3022	5.31758	-1	1.97946e-15
cg11763394	LOC654433	2	20	53	9.72768	4.01451	-1	1.21093e-28
cg11796565	NFIX	19	3	61	7.94559	10.0117	1	0.228721
cg11820824	S100A16	1	4	72	11.9524	8.12859	-1	0.00847103
cg12014646	SEMA6D	15	22	51	5.30905	6.65704	1	0.00266303
cg12104246	C6orf62	6	65	8	11.521	11.0122	-1	0.0135813
cg12118504	RGL2	6	22	54	10.2144	10.2042	-1	0.951871
cg12159023	HCN2	19	4	73	9.2259	9.26753	1	0.962964
cg12241532	PFKP	10	2	74	9.49565	10.366	1	0.44429
cg12265908	PFKP	10	9	13	8.29125	10.7835	1	0.000626902
cg12303582	PFKP	10	23	48	9.38774	10.726	1	0.00212467
cg12386285	PRDM5	4	9	4	3.08419	5.72581	1	0.0389487
cg12477370	RUNX2	6	18	59	5.75631	5.3293	-1	0.365636
cg12482993	FBXO21	12	33	36	11.3332	11.0905	-1	0.149692
cg12492094	PDE11A	2	76	2	5.01065	6.52927	1	0.453979
cg12498088	TTBK1	6	18	55	1.53779	0.381977	-1	0.0662209
cg12620443	ZNF853	7	72	4	6.87318	6.27299	-1	0.590279
cg12677436	SPTBN1	2	75	2	12.4396	12.6614	1	0.554804
cg12732998	ZIC1	3	58	19	-0.198101	3.25646	1	0.00377108
cg12782491	CLN5	13	75	2	9.19587	9.92515	1	0.087641
cg12889195	PAX8	2	22	52	8.14945	5.30797	-1	2.28353e-14
cg12889195	LOC654433	2	22	52	9.56009	3.97786	-1	3.86378e-29
cg12948621	HKR1	19	63	9	9.66832	9.43873	-1	0.170722
cg13073261	SNRPN	15	48	26	10.9668	10.0892	-1	0.161315
cg13073261	SNURF	15	48	26	2.55457	3.70157	1	0.129146
cg13209613	WNT3	17	13	55	0.793409	1.96385	1	0.259241
cg13286281	SLC7A4	22	51	19	6.4978	-0.931918	-1	3.53966e-14
cg13361007	BIVM	13	75	3	8.13314	7.03706	-1	0.0526811
cg13361007	KDELC1	13	75	3	6.55158	3.76526	-1	0.360422
cg13443165	B4GALT1	9	8	50	11.004	10.8194	-1	0.554169
cg13460057	PSMD5	9	70	6	9.64449	7.19929	-1	0.00662991
cg13460057	LOC253039	9	70	6	8.6249	5.44224	-1	0.00155335
cg13493426	NPAS3	14	4	70	3.52047	5.29927	1	0.23763
cg13639901	RBM33	7	2	68	9.51163	9.76659	1	0.104314
cg13726218	DACH1	13	43	10	6.38585	5.18884	-1	0.252229
cg13778222	NTM	11	27	32	2.40628	5.49878	1	0.000105214
cg13829104	TBX3	12	72	2	13.8724	6.09161	-1	0.0918333
cg13886636	ST6GALNAC4	9	22	24	7.72825	7.68319	-1	0.858004
cg13904214	RBM33	7	7	45	9.55852	9.7712	1	0.276155
cg13956401	ESYT2	7	9	67	11.2302	11.264	1	0.898332
cg13998890	FBXL7	5	2	76	7.0066	10.643	1	0.283839
cg14062899	TNXB	6	6	71	11.57	12.5357	1	0.402693
cg14276730	CHD6	20	37	29	10.2109	9.99532	-1	0.115439
cg14278148	UGCG	9	60	12	8.41013	6.1414	-1	0.000272857
cg14568259	NR6A1	9	74	4	2.22388	2.51882	1	0.587756
cg14615768	NTN1	17	19	59	3.49471	5.52476	1	0.00087176
cg14688905	SLC11A2	12	30	39	10.8251	9.79943	-1	2.19178e-06
cg14717116	NXN	17	25	52	6.82042	8.34642	1	3.36128e-06
cg14760797	NINJ2	12	2	73	6.51147	2.95861	-1	0.313191
cg14811105	NR4A2	2	10	63	6.56268	6.31575	-1	0.695722
cg14883448	KIAA1826	11	74	4	8.63601	8.66501	1	0.787526
cg14935716	PHF20L1	8	3	73	9.63297	9.54379	-1	0.710381
cg14989191	SEZ6L2	16	60	15	11.3942	11.6386	1	0.32211
cg14989191	ASPHD1	16	60	15	7.62009	6.6812	-1	0.0329954
cg15014355	ATXN1	6	3	33	7.72191	8.43463	1	0.241584
cg15091123	LRRC43	12	8	2	2.90844	3.20886	1	0.824217
cg15225701	FER	5	23	32	5.61248	5.26707	-1	0.243707
cg15228268	PFKP	10	3	52	8.92786	10.5868	1	0.0151208
cg15276629	ONECUT2	18	64	13	5.26115	7.12476	1	1.60169e-05
cg15291304	PHF5A	22	69	2	8.42371	7.59678	-1	0.22118
cg15291304	ACO2	22	69	2	11.8811	10.4579	-1	0.264497
cg15372508	ZNF660	3	62	13	2.42823	0.932631	-1	0.0183726
cg15412728	PCK2	14	76	2	8.92357	7.93774	-1	0.517337
cg15581305	NCLN	19	20	50	12.6587	12.4382	-1	0.19101
cg15803221	RARA	17	14	58	9.44702	8.942	-1	0.0151844
cg15810996	ZBTB7A	19	9	67	9.98085	9.8719	-1	0.478578
cg15860235	SH3BP2	4	3	57	10.4769	8.29465	-1	0.0734087
cg15916350	RNF130	5	3	74	10.152	10.6807	1	0.472114
cg16057532	KCND3	1	9	61	1.45498	2.98563	1	0.0643753
cg16108388	TFEB	6	17	58	8.05929	7.80729	-1	0.577897
cg16108388	PGCP	6	17	58	9.80516	9.53964	-1	0.308324
cg16110823	SEPN1	1	14	39	10.4541	10.5135	1	0.70272
cg16116203	PTMS	12	54	12	12.9286	11.5872	-1	0.00735605
cg16150677	RIN3	14	73	5	10.1499	7.8052	-1	0.00210369
cg16173067	SDCBP2	20	3	55	6.61887	6.05227	-1	0.332376
cg16257533	NTM	11	44	25	2.7943	6.23681	1	3.19814e-05
cg16327477	LTBP3	11	14	50	12.2733	11.1859	-1	3.62325e-05
cg16406892	TBX3	12	73	2	13.8533	6.09161	-1	0.0920246
cg16492615	SH3PXD2A	10	9	64	8.57586	8.79819	1	0.400983
cg16519433	PFKP	10	2	73	8.69044	10.4925	1	4.2864e-13
cg16640865	PDE2A	11	9	53	7.91846	10.9723	1	0.000714381
cg16719560	VAMP5	2	12	23	9.8888	8.00559	-1	5.21022e-06
cg16789104	SKAP1	17	10	67	9.54356	3.43518	-1	8.40832e-07
cg16918595	LRP1	12	76	2	10.9274	14.1911	1	0.259768
cg17003395	KIF16B	20	67	11	9.67802	9.93055	1	0.481072
cg17045801	HECW1	7	70	5	0.675622	2.14463	1	0.248824
cg17090716	NTM	11	22	48	1.87876	5.07029	1	1.89358e-05
cg17104961	NTM	11	13	59	1.64457	4.54706	1	0.0154315
cg17109175	MCM10	10	47	22	5.2576	5.40208	1	0.766174
cg17146731	PTPN13	4	11	55	9.06477	8.40126	-1	0.203667
cg17186388	WIPF3	7	7	58	6.1499	6.05035	-1	0.90596
cg17329534	ZBTB7B	1	28	43	10.6717	10.422	-1	0.095823
cg17375267	CCDC8	19	16	50	11.2072	7.93891	-1	1.43494e-10
cg17445212	PAX8	2	23	52	8.11179	5.30797	-1	2.48521e-13
cg17445212	LOC654433	2	23	52	9.52317	3.97786	-1	1.21469e-27
cg17472985	SMC4	3	42	9	10.3354	10.2938	-1	0.923203
cg17472985	IFT80	3	42	9	9.04499	8.45205	-1	0.123322
cg17816637	SLC7A4	22	16	36	6.12002	1.00727	-1	4.32312e-06
cg17851795	PBX2	6	4	62	10.409	10.4911	1	0.429808
cg17851795	GPSM3	6	4	62	7.14979	6.60782	-1	0.571197
cg17865371	OTUD7B	1	3	74	8.61875	8.9029	1	0.527847
cg17881007	WDR86	7	4	70	3.94808	0.0874244	-1	0.0596502
cg17908564	EPHA3	3	54	9	4.45964	4.10025	-1	0.773757
cg17968925	SSU72	1	10	64	11.001	11.124	1	0.60054
cg18002602	SLC29A2	11	19	52	6.13882	5.85201	-1	0.545032
cg18061395	MYO10	5	5	57	7.04636	10.3132	1	0.0220573
cg18107960	WDR41	5	61	4	9.61431	9.05594	-1	0.00177139
cg18146389	MGAT5B	17	8	67	2.30305	3.66213	1	0.0816368
cg18187148	CSMD2	1	5	70	3.78927	4.72448	1	0.192914
cg18273464	TNRC18	7	10	32	11.0115	10.8355	-1	0.47898
cg18299835	NFIX	19	15	50	8.71301	10.2025	1	0.000715336
cg18435449	ZIK1	19	69	3	6.59005	6.00152	-1	0.126995
cg18479961	CHPF2	7	27	44	11.7623	11.5686	-1	0.155742
cg18653451	CCDC8	19	29	43	11.3165	7.58989	-1	4.63722e-11
cg18761894	HSPA6	1	17	35	6.77225	6.34216	-1	0.330851
cg18959827	OR51E2	11	41	14	0.368671	0.484083	1	0.85469
cg19074198	SLC19A1	21	26	28	8.23181	7.63646	-1	0.0119717
cg19143629	SMARCD2	17	72	6	11.0642	11.0411	-1	0.92693
cg19172575	GATA4	8	26	43	2.38767	6.87669	1	3.7931e-07
cg19185133	C11orf54	11	71	2	8.05626	7.11614	-1	0.366447
cg19185133	TAF1D	11	71	2	8.63523	7.51105	-1	0.323144
cg19203115	B4GALT6	18	21	42	8.5542	7.26496	-1	0.000223542
cg19211800	MARCKS	6	71	6	10.5768	8.79404	-1	0.0546906
cg19458020	RARA	17	13	54	9.30151	8.86853	-1	0.00209213
cg19547141	MLL	11	9	67	9.86651	9.8554	-1	0.958944
cg19552640	MEGF10	5	64	14	9.30405	3.78074	-1	2.22233e-05
cg19715936	DDC	7	19	55	-0.727084	2.66525	1	0.000148522
cg19791379	ERC1	12	2	76	11.5737	10.4976	-1	0.171672
cg19803984	SNRPN	15	72	3	10.7101	8.6981	-1	0.362923
cg19824059	NRXN1	2	27	42	-0.427468	-1.14235	-1	0.080475
cg19832331	FARP1	13	10	59	11.6828	10.733	-1	0.0252146
cg20024110	HLA-DOA	6	6	71	7.3864	6.33476	-1	0.211887
cg20132273	FNDC3A	13	47	10	11.1108	10.7437	-1	0.127892
cg20208384	SLC12A8	3	59	17	5.08515	4.99533	-1	0.893783
cg20318096	FABP3	1	60	16	11.3526	7.96572	-1	0.000196085
cg20340149	CLASP1	2	9	66	10.0369	10.19	1	0.336597
cg20484653	NFASC	1	40	32	7.79131	8.93102	1	0.0125631
cg20591652	HDAC4	2	7	58	8.8634	8.54583	-1	0.142482
cg20626645	CACNA1D	3	76	2	7.86371	5.07022	-1	0.171692
cg20699736	VAX2	2	72	4	3.75388	2.77171	-1	0.307991
cg20740903	TK1	17	7	62	7.89065	8.06599	1	0.840875
cg20745684	WIPF3	7	5	60	4.41421	5.93286	1	0.0774224
cg20781438	KIAA0754	1	59	17	3.65399	3.28205	-1	0.309016
cg20781438	MACF1	1	59	17	11.1748	11.2202	1	0.710348
cg20794824	CLDN11	3	2	71	4.25492	3.7771	-1	0.880305
cg21142349	MED13L	12	5	71	10.8677	10.2432	-1	0.0491055
cg21238609	RARA	17	14	52	9.36852	8.84357	-1	0.0396447
cg21402035	GALR3	22	15	57	-1.00215	-0.808512	1	0.734215
cg21468035	ABHD1	2	39	31	2.46299	2.49882	1	0.922632
cg21482265	PAX8	2	24	52	8.07119	5.31773	-1	1.82046e-13
cg21482265	LOC654433	2	24	52	9.44725	3.97629	-1	3.61328e-27
cg21550016	PAX8	2	19	53	8.3331	5.31758	-1	7.26259e-15
cg21550016	LOC654433	2	19	53	9.79071	4.01451	-1	1.80398e-28
cg21655931	EPB41L1	20	2	62	11.7584	12.8556	1	0.590421
cg21988041	GLT8D2	12	72	6	6.63513	5.72812	-1	0.134913
cg22032626	NCKAP5L	12	11	62	10.2594	10.4966	1	0.254149
cg22233512	MSI2	17	5	72	8.88341	8.46032	-1	0.318512
cg22720041	ZNF229	19	65	6	7.98614	5.77747	-1	0.0100454
cg22744368	SLCO4A1	20	48	26	8.10718	6.46746	-1	0.00347531
cg22795470	HECW1	7	73	5	0.688255	1.78699	1	0.377874
cg23041250	PLXNB2	22	2	76	12.8878	12.6046	-1	0.375253
cg23238677	LRP2	2	69	4	-0.85273	-0.737021	1	0.794549
cg23244877	TSEN54	17	7	65	8.8925	9.12584	1	0.333036
cg23284245	ESR2	14	11	59	6.02318	5.42817	-1	0.374529
cg23295127	TPD52	8	28	46	8.60683	7.90042	-1	0.0788393
cg23369564	PLEKHO1	1	7	61	10.8177	9.15515	-1	0.0336012
cg23476065	WDR86	7	10	54	2.05107	0.219264	-1	0.10496
cg23644624	SLC7A4	22	50	25	6.54863	-1.06884	-1	1.94616e-17
cg23662675	ZMYND8	20	74	4	11.3547	9.46982	-1	0.0291771
cg23718418	PHF1	6	58	10	10.971	11.0345	1	0.746493
cg23813012	PRDM2	1	58	13	9.13485	9.17775	1	0.770722
cg23819145	ITSN2	2	2	54	9.54064	9.25014	-1	0.00412818
cg23851011	S100A16	1	6	68	10.7124	8.03385	-1	0.0289287
cg23894948	SLC7A4	22	21	34	6.43543	0.577178	-1	9.73943e-09
cg23926670	PTHLH	12	22	44	6.35691	4.60996	-1	0.00579551
cg24086040	ANKMY1	2	3	66	8.2555	7.45014	-1	0.083187
cg24144070	CCDC57	17	74	3	7.67209	7.05633	-1	0.000182105
cg24178500	PABPC1L	20	71	5	6.89713	6.20837	-1	0.100321
cg24333422	FBP1	9	65	12	6.44649	5.51111	-1	0.0899955
cg24364564	GJD3	17	75	3	4.99092	4.1517	-1	0.533277
cg24393699	DENND1B	1	57	16	3.72512	2.16975	-1	0.00258825
cg24492273	VWA1	1	3	66	8.77957	9.60585	1	0.19819
cg24539848	ANKMY1	2	2	73	8.20968	7.43207	-1	0.396816
cg24688574	CDK11B	1	17	30	9.59732	9.23207	-1	0.0144643
cg24695614	PFKP	10	5	71	8.4912	10.4891	1	0.174458
cg24705939	RBPMS	8	50	26	9.92853	9.6128	-1	0.265383
cg24871714	ZNF529	19	61	14	8.60614	8.33686	-1	0.259526
cg24871714	ZNF382	19	61	14	5.55827	4.65777	-1	0.0351249
cg24902920	TFAP2A	6	21	53	2.68491	3.64785	1	0.0158628
cg24947212	ADAM12	10	22	35	4.13173	6.3683	1	7.90273e-05
cg25002129	NTM	11	27	24	2.0985	6.33539	1	3.93507e-06
cg25058261	TBX3	12	72	4	13.866	7.57229	-1	0.00752716
cg25061701	SMURF2	17	9	66	8.05047	7.87685	-1	0.570118
cg25145459	NFATC1	18	75	2	6.69001	6.47982	-1	0.952426
cg25325723	FERMT1	20	2	65	8.4168	7.98105	-1	0.693618
cg25461865	ENPP3	6	40	34	8.11024	4.35137	-1	1.21506e-08
cg25623727	FBXL7	5	14	61	9.92308	10.7168	1	0.129181
cg25663764	ARVCF	22	2	75	7.65446	7.9202	1	0.840091
cg25692621	ASB4	7	59	9	7.89816	3.44242	-1	0.0073181
cg25859670	NTM	11	4	52	2.80909	4.72896	1	0.0802127
cg25953310	ACAD10	12	22	32	9.82095	9.4328	-1	0.0542205
cg26164773	TIAL1	10	4	70	9.40732	10.2623	1	0.0702322
cg26176665	MPRIP	17	2	74	11.6165	10.777	-1	0.489035
cg26361313	LOC282997	10	76	2	6.08929	4.10195	-1	0.16054
cg26361313	PDCD4	10	76	2	11.3819	9.8686	-1	0.190992
cg26373134	JARID2	6	2	57	8.82317	8.32741	-1	0.482241
cg26407811	PRKAG2	7	3	51	7.26199	7.64609	1	0.498379
cg26411452	C1orf86	1	12	45	9.04892	8.96429	-1	0.681035
cg26465611	MEGF10	5	63	14	9.24426	4.21571	-1	0.000242572
cg26551865	TRABD	22	34	35	9.21902	9.04791	-1	0.310386
cg26730369	ADRA1A	8	61	14	-0.958362	-0.491494	1	0.377523
cg26736878	GLT25D1	19	11	57	10.8772	10.5814	-1	0.109137
cg26768556	PDK2	17	36	35	11.1271	9.77474	-1	5.27532e-08
cg26847490	ASB4	7	59	12	7.97288	3.22422	-1	0.000798342
cg26854559	SLIT2	4	28	32	3.9339	7.58104	1	1.27098e-06
cg26869615	NAV2	11	3	72	8.5502	7.19092	-1	0.161455
cg26871350	F2RL2	5	5	66	3.30308	3.17575	-1	0.954097
cg26871350	IQGAP2	5	5	66	10.0788	10.9625	1	0.293477
cg26916764	CSDE1	1	3	74	13.3079	12.6084	-1	0.0833338
cg26979107	MAPT	17	12	64	5.29098	6.9798	1	0.0329754
cg27016549	NTM	11	38	32	2.48882	6.02371	1	1.41965e-06
cg27019201	ITGB2	21	9	53	9.39337	8.28301	-1	0.0909742
cg27026192	KIFC3	16	3	73	11.2745	10.5557	-1	0.254587
cg27061836	BCAT2	19	3	72	10.1034	10.4271	1	0.206774
cg27071707	TCF3	19	10	43	10.0611	9.70551	-1	0.202684
cg27158677	ADAM12	10	12	63	4.23023	5.50956	1	0.0936573
cg27174108	C19orf33	19	8	67	3.81263	1.485	-1	0.19171
cg27174108	YIF1B	19	8	67	9.89496	10.0706	1	0.490746
cg27307298	RNF207	1	5	68	7.08164	5.90142	-1	0.0339244
cg27331495	DTWD2	5	49	21	7.71317	7.9233	1	0.284329
cg27346988	ITGB4	17	9	58	7.04991	5.60338	-1	0.146175
cg27369452	DNMT3A	2	65	12	8.9192	8.42396	-1	0.189801
cg27527630	WIPF3	7	4	71	5.28999	5.75522	1	0.71999
cg27539060	MAP3K5	6	75	2	10.4497	9.35922	-1	0.154492
cg27645259	LTBP4	19	72	6	9.68744	10.4645	1	0.302926
ch.10.2770541R	FAM196A	10	66	10	0.357258	2.55201	1	0.010598
ch.10.2770541R	DOCK1	10	66	10	9.40671	9.54935	1	0.650607
ch.2.4679874R	EIF4E2	2	57	5	10.2967	9.99237	-1	0.00513434
